# Supplementary material for: Ticagrelor Added to Aspirin in Acute Nonsevere Ischemic Stroke or Transient Ischemic Attack of Atherosclerotic Origin
Source: PubMed Central journal article supplement — Stroke. 2020 Nov 16;51(12):3504–13. doi: 10.1161/STROKEAHA.120.032239 (PMC7678660; doi:10.1161/strokeaha.120.032239), 2020-11-16
Supplement: str-51-3504-s002.pdf [file str-51-3504-s002.pdf]

## **TICAGRELOR ADDED TO ASPIRIN IN ACUTE ISCHEMIC STROKE OR TIA OF ATHEROSCLEROTIC ORIGIN**

Pierre Amarenco, Hans Denison, Scott R. Evans, Anders Himmelmann, Stefan James, Mikael Knutsson, Per Ladenvall, Carlos A. Molina, Yongjun Wang, S. Claiborne Johnston, on behalf of the THALES Steering Committee and Investigators

### **TABLE OF CONTENT**

- 1. Supplemental Figure I (Flow diagram).....Page 2**
- 2. Supplemental Table I (Outcome by extra/intracranial atherosclerotic stenosis location).....Page 3**
- 3. Trial Leadership, Committees and Investigators.....Page 4**

## Supplemental Figure I. Flow Diagram of Study Participants

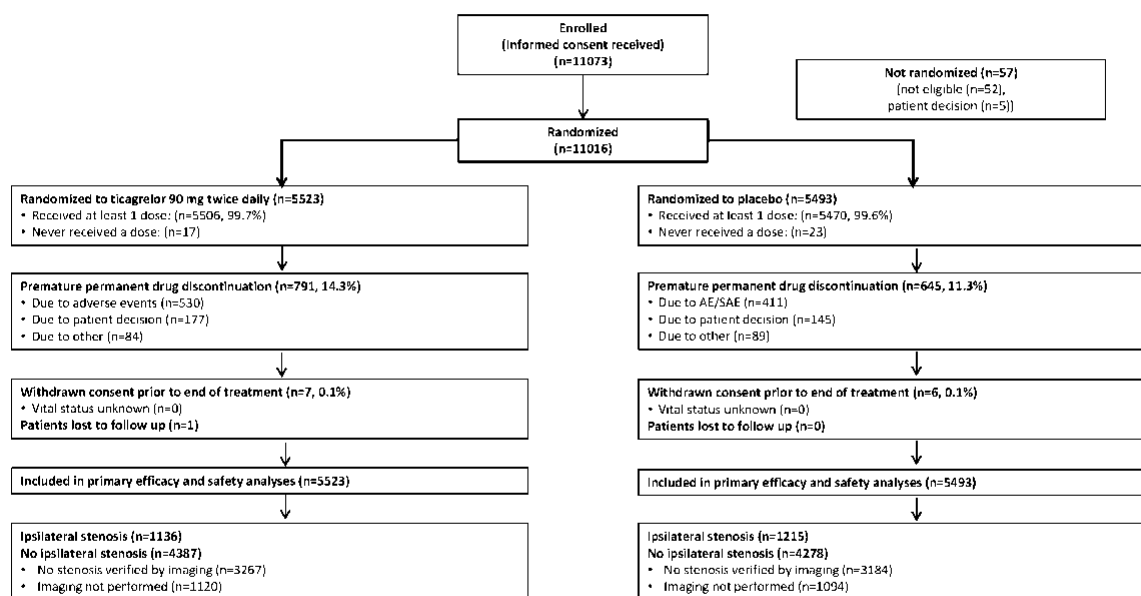

**Supplemental Table I.** Outcome at day 30 according to extra or intracranial artery location of atherosclerotic stenosis

| Characteristic                                                | Ticagrelor 90 mg bid<br>(N=5523) |                          |      | Placebo<br>(N=5493) |                          |      | Hazard ratio | 95% CI       | p-value |
|---------------------------------------------------------------|----------------------------------|--------------------------|------|---------------------|--------------------------|------|--------------|--------------|---------|
|                                                               | n                                | Patients with events (%) | KM % | n                   | Patients with events (%) | KM % |              |              |         |
| Patients with ipsilateral atherosclerotic stenosis $\geq$ 30% | 1136                             | 92 (8.1)                 | 7.9  | 1215                | 132 (10.9)               | 10.9 | 0.73         | (0.56, 0.96) | 0.023   |
| In extracranial artery $\geq$ 30%                             | 834                              | 63 (7.6)                 | 7.6  | 873                 | 78 (8.9)                 | 8.9  | 0.84         | (0.60, 1.17) | 0.306   |
| In intracranial artery $\geq$ 30%                             | 516                              | 53 (10.3)                | 9.9  | 558                 | 85 (15.2)                | 15.2 | 0.66         | (0.47, 0.93) | 0.016   |

# THALES LEADERSHIP, COMMITTEES AND INVESTIGATORS

## Executive Committee

### **Voting EC-members:**

S. Claiborne Johnston, MD, PhD (Chairman, International Coordinating Investigator); Pierre Amarenco, MD (Vice Chairman, International Coordinating Investigator); Scott R. Evans, PhD; Stefan K James, MD, PhD; Yongjun Wang MD.

### **Non-voting EC members:**

Carlos A. Molina, MD, PhD, FRCP; Anders Himmelmann, MD, PhD; Hans Denison, MD, PhD; Per Ladenvall, MD, PhD.

## Steering Committee

Carlos A. Molina, MD, (Chairman), Per Ladenvall, (Vice Chairman), the Executive Committee Members, National Lead Investigators: Sebastián Ameriso (Argentina), Stephen Davis (Australia), Robin Lemmens (Belgium), Luiz Marrone (Brazil), Ekaterina Titianova (Bulgaria), Kenneth Butcher (Canada), Yongjun Wang, Shuya Li, Huaguang Zheng (China), David Skoloudik (Czechia), Pierre Amarenco (France), Joachim Röther (Germany), Lawrence Wong (Hong Kong), Norbert Szegedi (Hungary), Padma Srivastava, Sharma Vikram (India), Giancarlo Agnelli, Danilo Toni (Italy), Angel Antonio Arauz Gongora (Mexico), Edwin Pretell (Peru), Anna Czlonkowska (Poland), Ovidiu-Alexandru Bajenaru (Romania), Ketevana Meshkova, Liudmila Vitalievna Stakhovskaya (Russia), Saeed Alghamdi, Fahmi Al-Senani (Saudi Arabia), Miroslav Brozman (Slovakia), Hee-Joon Bae (South Korea), Carlos A. Molina (Spain), Lars Sjöblom, Stefan K. James (Sweden), Tsong-Hai Lee (Taiwan), Nijasri Charnnarong Suwanwela (Thailand), Moskovko Sergii (Ukraine), Thang Huy Nguyen (Vietnam)

## Independent Data Monitoring Committee

### **Voting members**

Bo Norrving, MD, PhD, (DMC Chair) Department of Clinical Sciences, Department of Neurology, Skane University Hospital, Lund, Sweden.

Bruce Ovbiagele, MD, MSc, MAS, MBA, Department of Neurology, University of California San Francisco, San Francisco, CA, United States of America.

Stuart Pocock, MSc, PhD, Department of Medical Statistics, Medical Statistics Unit, London School of Hygiene and Tropical Medicine, London, United Kingdom.

### **Statistical Data Analysis Centre Statistician (non-voting)**

Tim Clayton, MSc, PhD, Department of Medical Statistics, Medical Statistics Unit, London School of Hygiene and Tropical Medicine, London, United Kingdom

## Sponsor Leadership

Maria Aunes, MD (Global Safety Physician), Maria Bekirova (Site management and monitoring), Filip Birve (Study statistician), Marcus Bjärelund (Project Management), Charlotte Casselgård (Global Data Management Lead), Björn Dahlöf (Programming), Hans Denison, MD, PhD (Senior Medical Lead), Alina Andreea Dragos (Site management and monitoring), Marta Dudek (Enablement), Daria Goździkowska-Fronczak (Global Study Leader), Anders Himmelmann, MD, PhD (Global Clinical Lead), Marianne Jahreskog (Principal Pharmaco-Vigilance Scientist), Mikael Knutsson, PhD (Global Product Statistician), Per Ladenvall, MD, PhD (Lead Study Physician), Sven Nylander, PhD (Study scientist), Sandra Ranft (Global Study Leader), Mikael Staf (Programming), Maj Stark (Director Clinical Development), Åsa Westin (Associate Director Clinical Development), Grzegorz Zajac MD (Study physician).

## Site Principle Investigators by Country

### Argentina

#### National Lead Investigator: Sebastián Ameriso

Sebastian Ameriso; Guadalupe Bruera; Conrado Estol; Maia Gomez Schneider; Leonardo Gonzalez; Gustavo Herrera; Pablo Ioli; Lorena Jure; Fernando Lipovestky; Juan Jose Martin Artesi; Santiago Pigretti; Guillermo Povedano; Virginia A. Pujol Lereis; María Cristina Zurru

### Australia

#### National Lead Investigator: Stephen Davis

Stephen Davis; Andrew Lee; Arman Sabet; Vincent Thijs; Tissa Wijeratne; Andrew Wong

### Belgium

#### National Lead Investigator: Robin Lemmens

Adinda De Pauw; Wouter De Vooght; Philippe Desfontaines; Marie-Christine Hasenbroekx; Robin Lemmens; Vicky Maqueda; Regilio Oedit; André Peeters; Wendy Van Daele; Peter Vanacker; Yves Vandermeeren; Geert Vanhooren; Iris Vansteenkiste; Laetitia Yperzeele

### Brazil

#### National Lead Investigator: Luiz Marrone

Rodrigo Bazan; Daniel Bezerra; Marianna Dracoulakis; Pedro Kowacs; Paulo Macelino; Luiz Marrone; Carla Moro; Marco Tulio Pedatella; Octavio Pontes Neto

### Bulgaria

#### National Lead Investigator: Ekaterina Titianova

Tanya Beleva; Dimcho Hristov; Rumeliya Ivanova; Borislav Kralev; Dimitar Maslarov; Margarita Mihailova; Plamen Petkov; Nikolay Sotirov; Ivan Staikov; Ekaterina Titianova

### Canada

#### National Lead Investigator: Kenneth Butcher

Michel Beaudry; Andrew Demchuk; Sumiti Nayar; Ashfaq Shuaib; Anthony Winder

### China

#### National Lead Investigator: Yongjun Wang, Shuya Li, Huaguang Zheng

Huisheng Chen; Xueshuang Dong; Huishan Du; Deqin Geng; Wenke Hong; Bo Hu; Zhiping Hu; Yan Jia; Kaifu Ke; Guozhong Li; Xiaohong Li; Xiaogang Li; Yongqiu Li; Dongfang Li; Yongqiang Li; Gang Li; Li Liu; Yunhai Liu; Qi Liu; Xiaoping Pan; Qiumin Qu; Wei Shen; Zhi Song; Qi Wan; Dong Wang; Lijuan Wang; Peifu Wang; Yukai Wang; Yan Wang; Dongyu Wang; Guoqiang Wen; Yuncheng Wu; Xufang Xie; Xiaolin Xu; Lijun Xu; Deen Xu; Anding Xu; Mingxiu Yang; Tingmin Yu; Yunhua Yue; Jinsheng Zeng; Zhaohui Zhang; Xu Zhang; Baorong Zhang; Meiyun Zhang; Xingquan Zhao; Shigang Zhao; Xiuli Zhao; Weihong Zheng; Runxiu Zhu

### Czechia

#### National Lead Investigator: David Skoloudik

Jana Bednarova; Petr Geier; David Hlinovsky; Robert Mikulik; Jiri Neumann; Martin Roubec; Daniel Vaclavik

### France

#### National Lead Investigator: Pierre Amarenco

Sonia Alamowitch; Pierre Amarenco; Caroline Arquizan; Aude Bagan-Triquenot; Yannick Bejot; Charlotte Cordonnier; Xavier Ducrocq; Emmanuel Ellie; Pierre Garnier; Benoît Guillon; Bertrand Lapergue; Marie-Hélène Mahagne; Thierry Moulin; Michael Obadia; Jean-Marc Olivot; Frédéric Philippeau; Fernando Pico; Nicolas Raposo; Peggy Reiner; Sébastien Richard; Gilles Rodier; Yves Samson; Igor Sibon; Didier Smadja; Serge Timsit; Emmanuel Touze; Stéphane Vannier; Valérie Wolff

### Germany

#### National Lead Investigator: Joachim Röther

Jörg Berrouschot; Rainer Dziewas; Jörg Glahn; Bernd Kallmünzer; Martin Köhrmann; Lars Marquardt; Darius

Nabavi; Carsten Pohlmann; Joachim Röther; Hassan Soda; Christoph Terborg; Karin Weißenborn

### **Hong Kong**

#### **National Lead Investigator: Lawrence Wong**

Raymond Cheung; Joshua Wai Ming Fok; Wing Chi Fong; Michael Fu; Richard Li; Siu Hung Li; Yannie Oi-Yan Soo; Kin Keung Yip

### **Hungary**

#### **National Lead Investigator: Norbert Szegedi**

Dániel Bereczki; Attila Csányi; Péter Diószeghy; András Folyovich; Levente Kerényi; Sándor Molnár; Valéria Nagy; Krisztián Pozsegovits; Gyula Pánczél; Csilla Rózsa; László Szapáry; Norbert Szegedi; Mária Sátor; Gyula Timár; Attila Valikovics; Ildikó Vastagh

### **India**

#### **National Lead Investigator: Padma Srivastava, Vikram Sharma**

Gopal Adrasetty; Abu Ansari; Raghavendra B.S.; Jaideep Bansal; Indraneel Basu; Rahul Baviskar; Vivek Junewar; Priyanka Kashyap; Kewal Krishan; Advait Prakash Kulkarni; Rajnish Kumar; Hrishikesh Kumar; Praveen S Kumar; Vijaya Pamidimukkala; K Pramod; Atul Prasad; TCR Ramakrishnan; Sanjay Ramteke; Vikram Sharma; Sumit Singh; Padma Srivastava; Alok Verma; Amit Yeole

### **Italy**

#### **National Lead Investigator: Giancarlo Agnelli, Danilo Toni**

Alessandro Adami; Giancarlo Agnelli; Guido Bigliardi; Federico Carimati; Alberto Chiti; Letizia Cupini; Alessandro De Vito; Massimo Del Sette; Marialuisa Delodovici; Cinzia Finocchi; Michelangelo Mancuso; Giuseppe Micieli; Giovanni Orlandi; Francesco Perini; Francesca Pezzella; Stefano Ricci; Luisa Roveri; Rossana Tassi; Tiziana Tassinari; Giampaolo Tomelleri; Danilo Toni; Carla Zanferrari; Andrea Zini

### **Mexico**

#### **National Lead Investigator: Angel Antonio Arauz Gongora**

Angel Arauz Góngora; Edgar Castillo Vargas; José Chacon Romero; Fernando Cruz Castillo; Juan Gongora Rivera; Minerva López Ruíz; Jesús López Tapia; Guillermo Rivera Martinez; Jose Ruiz-Sandoval; Angelica Ruíz Franco; Jorge Villarreal Careaga

### **Peru**

#### **National Lead Investigator: Edwin Pretell**

Luisa Cardoza; Cesar Castañeda; Carlos Chavez; Nilton Custodio; Nestor Najjar; Oscar G. Pamo Reyna; Julio Perez; Edwin Pretell; Maria Reyes

### **Poland**

#### **National Lead Investigator: Anna Czlonkowska**

Zbigniew Bak; Tomasz Berkowicz; Marta Bilik; Waldemar Broła; Slawomir Brzozowski; Anna Czlonkowska; Waldemar Fryze; Malgorzata Fudala; Szymon Jurga; Bartosz Karaszewski; Jan Kochanowicz; Anetta Lasek-Bal; Jan Mejnartowicz; Ryszard Nowak; Konrad Rejdak; Jacek Rozniecki; Dorota Rózanski; Piotr Sobolewski; Maciej Swiat; Dorota Szkopek; Andrzej Tutaj; Marek Zalisz; Beata Zwiernik

### **Romania**

#### **National Lead Investigator: Ovidiu-Alexandru Bajenaru†**

Ovidiu Bajenaru;† Rodica Balasa; Dan Cuciureanu; Cristina Panea; Bogdan Popescu; Corina Roman-Filip; Monica Sabau; Mihaela Simu

### **Russia**

#### **National Lead Investigator: Ketevana Meshkova, Liudmila Vitalievna Stakhovskaya**

Leila Akhmadeeva; Sergei Aksentiev; Olga Androfagina; Oleg Artyukov; Andrey Belkin; Svetlana Berns; Svetlana Chuprina; Ekaterina Drozdova; Inna Ershova; Konstantin Golikov; Aida Iakupova; Dina Khasanova; Evgeniy Kovalchuk; Andrey Kovalenko; Elena Kuznetsova; Liudmila Lenskaya; Tatyana Lokshtanova; Alexander Malygin; Elena Melnikova; Anna Milto; Elena Mordvintseva; Rostislav Nilk; Liudmila Odnopozova; Dmitry Popov; Evgenij Pudov; Elena Reznik; Ilya Sholomov; Lybov Shpagina; Liudmila Stakhovskaya; Marine Tanashyan; Elena

Vasilieva; Mikhail Zykov

#### **Saudi Arabia**

##### **National Lead Investigator: Saeed Alghamdi, Fahmi Al-Senani**

Fahmi Al-Senani; Saeed Alghamdi; Fawaz Alhussein; Ali Alkhathaami; Nouf Almansour

#### **Slovakia**

##### **National Lead Investigator: Miroslav Brozman**

Miroslav Brozman; Andrea Cimprichova; Miloslav Dvorak; Ladislav Gurcik; Michal Kovacic; Georgi Krastev; Egon Kurca; Marian Kycina; Marta Mikloskova; Richard Risnovsky; Vlastimil Serdahely; Erika Zacharova

#### **South Korea**

##### **National Lead Investigator: Hee-Joon Bae**

Hee-Joon Bae; Jae-Kwan Cha; Dae-Il Chang; Yong-Jin Cho; Jay Chol Choi; Yangha Hwang; Joon-Tae Kim; Kyung Bok Lee; Jun Lee; Soo Joo Lee; Byung-Chul Lee; Jong-Moo Park; Moo Seok Park; Joung-Ho Rha; Dong-Ick Shin; Sung-Il Sohn; Sang Min Sung

#### **Spain**

##### **National Lead Investigator: Carlos Molina**

Juan Arenillas Lara; Miguel Ángel Gamero García; Meritxell Gomis Cortina; Aida Lago Martín; Nicolás López Hernández; Javier Marta Moreno; Joan Martí-Fàbregas; Jaime Masjuan Vallejo; Carlos Molina Cateriano; Francisco Moniche Álvarez; Francisco Purroy García; Soledad Pérez Sánchez; Jaume Roquer González; Tomás Segura Martín; Joaquín Serena Leal; Carlos Tejero Juste; Santiago Trillo Senín

#### **Sweden**

##### **National Lead Investigator: Lars Sjöblom, Stefan James**

Niaz Ahmed; Margarita Callander; Björn Cederin; Jan-Erik Karlsson; Christine Kremer; Ann Charlotte Laska; Arne Lindgren; Thomas Mooe; Mihaela Oana Romanitan; Lars Sjöblom

#### **Taiwan**

##### **National Lead Investigator: Tsong-Hai Lee**

Lung Chan; Chih-Hung Chen; Ta-Cheng Chen; Chin-I Chen; Po-Lin Chen; Wei-Shih Huang; Wen-Yi Huang; Jiann-Shing Jeng; Tsong-Hai Lee; Li-Ming Lien; Huey-Juan Lin; Ruey-Tay Lin; Hsiu-Fen Lin; Chia-Wei Liou; Helen L. Po; Yu Sun; Chun-Pai Yang

#### **Thailand**

##### **National Lead Investigator: Nijasri Charnnarong Suwanwela**

Arkhom Arayawichanon; Tabtim Chongsuvivatwong; Aurauma Chutinet; Witoon Jantararotai; Wasutha Khaykhaew; Makorn Limudomporn; Saengduan Mayotarn; Sombat Muengtaweepongsa; Yongchai Nilanont; Supachai Paiboonpol; Kanoksri Samintharapanya; Duangpol Srimanee; Suwat Srisuwananukorn; Tasanee Tantirittisak; Thanoot Thamangraksat; Somsak Tiamkao; Chesda Udommongkol

#### **Ukraine**

##### **National Lead Investigator: Sergii Moskovko**

Nataliia Chemer; Alla Cherkez; Galyna Chmyr; Hanna Hrebenuk; Marta Khavunka; Iryna Kobets; Nataliia Lytvynenko; Sergii Moskovko; Olha Myronova; Vadym Nikonov; Svitlana Shkrobot; Lyudmyla Shulga; Ivanna Tashchuk; Nataliya Tomakh; Valentyna Yavorska

#### **Vietnam**

##### **National Lead Investigator: Thang Huy Nguyen**

Nhan Le; Thang Nguyen; Nga Nguyen; Anh Nguyen; Binh Nguyen; Thang Nguyen; Ngoc Nguyen; Quang Nguyen; Dai Pham; Thanh Tran; Tan Vo

† Deceased
